# Supplementary material for: Multi-drug loaded eugenol-based nanoemulsions for enhanced anti-mycobacterial activity
Source: Royal Society of Chemistry journal article supplement (doi:10.1039/d2md00320a), 2023-01-01
Supplement: d2md00320a1.pdf [file d2md00320a1.pdf]

## 1 SUPPLEMENTARY DATA

| Model for simulated fluids |     | Cinnamon drug loaded nanoemulsion |         |           | Clove drug loaded nanoemulsion |         |           | Eugenol drug loaded nanoemulsion |         |           |
|----------------------------|-----|-----------------------------------|---------|-----------|--------------------------------|---------|-----------|----------------------------------|---------|-----------|
|                            |     | R <sup>2</sup>                    | Slope   | Intercept | R <sup>2</sup>                 | Slope   | Intercept | R <sup>2</sup>                   | Slope   | Intercept |
| Zero Order Model           | SGF | 0.8231                            | 0.0865  | 1.7408    | 0.949                          | 0.306   | -1.703    | 0.823                            | 0.102   | 2.6683    |
|                            | SGS | 0.9285                            | 0.1749  | -0.8963   | 0.9817                         | 0.2892  | 0.1958    | 0.9227                           | 0.3955  | -2.6808   |
|                            | ALF | 0.909                             | 0.2028  | 1.1975    | 0.9588                         | 0.2541  | -2.3338   | 0.9877                           | 0.2268  | -1.2121   |
| First Order Model          | SGF | 0.8283                            | -0.0004 | 1.9925    | 0.949                          | -0.306  | 101.7     | 0.823                            | -0.102  | 97.332    |
|                            | SGS | 0.9315                            | -0.0008 | 2.0053    | 0.9817                         | -0.2892 | 99.804    | 0.9227                           | -0.3955 | 102.68    |
|                            | ALF | 0.9237                            | -0.001  | 1.996     | 0.9588                         | -0.2541 | 102.33    | 0.9877                           | -0.2268 | 101.21    |
| Hixon Crowell Model        | SGF | 0.8262                            | 0.0014  | 0.0271    | 0.9543                         | 0.0054  | -0.0372   | 0.8313                           | 0.0017  | 0.0418    |
|                            | SGS | 0.9308                            | 0.0029  | -0.0169   | 0.987                          | 0.0051  | -0.0068   | 0.9388                           | 0.0073  | -0.0604   |
|                            | ALF | 0.919                             | 0.0034  | 0.016     | 0.9574                         | 0.0044  | -0.0447   | 0.9817                           | 0.0039  | -0.026    |
| Higuchi Model              | SGF | 0.9152                            | 1.0445  | -0.4173   | 0.8197                         | 3.2564  | -6.7981   | 0.9684                           | 1.267   | -0.0816   |
|                            | SGS | 0.795                             | 1.8535  | -3.7623   | 0.8901                         | 3.1529  | -5.0567   | 0.7908                           | 4.1927  | -9.172    |
|                            | ALF | 0.9002                            | 2.3113  | -3.0646   | 0.7737                         | 2.6136  | -6.0409   | 0.8214                           | 2.3678  | -4.7255   |
| Korsmeyer Peppas Model     | SGF | 0.955                             | 0.5078  | -0.0378   | 0.6645                         | 0.8578  | 0.7217    | 0.9858                           | 1.7538  | 0.0395    |
|                            | SGS | 0.7273                            | 0.602   | -0.2025   | 0.9514                         | 1.294   | 0.1869    | 0.5803                           | 0.7175  | 0.8256    |
|                            | ALF | 0.8392                            | 0.7011  | -0.155    | 0.7411                         | 1.1097  | 0.6034    | 0.8592                           | 1.301   | 0.3988    |

2

3 **Table S1: External factors evaluation matrix analysis for the release of Isoniazid in**  
4 **three different simulated body fluids.**

| Model for simulated fluids |     | Cinnamon drug loaded nanoemulsion |         |           | Clove drug loaded nanoemulsion |         |           | Eugenol drug loaded nanoemulsion |         |           |
|----------------------------|-----|-----------------------------------|---------|-----------|--------------------------------|---------|-----------|----------------------------------|---------|-----------|
|                            |     | R <sup>2</sup>                    | Slope   | Intercept | R <sup>2</sup>                 | Slope   | Intercept | R <sup>2</sup>                   | Slope   | Intercept |
| Zero Order Model           | SGF | 0.9259                            | 0.0799  | 1.6371    | 0.9499                         | 0.2578  | -1.7404   | 0.9143                           | 0.2315  | 1.4742    |
|                            | SGS | 0.93                              | 0.1749  | -0.8963   | 0.9819                         | 0.1444  | 1.2346    | 0.9679                           | 0.2019  | -1.7113   |
|                            | ALF | 0.865                             | 0.2327  | 0.9133    | 0.9782                         | 0.2836  | -2.0946   | 0.9551                           | 0.3453  | 0.035     |
| First Order Model          | SGF | 0.9259                            | -0.0799 | 98.363    | 0.9499                         | -0.2577 | 101.74    | 0.9143                           | -0.2315 | 98.526    |
|                            | SGS | 0.93                              | -0.1749 | 100.9     | 0.9819                         | -0.1444 | 98.765    | 0.9679                           | -0.2019 | 101.71    |
|                            | ALF | 0.865                             | -0.2327 | 99.087    | 0.9782                         | -0.2836 | 102.09    | 0.9551                           | -0.3453 | 99.965    |
| Hixon Crowell Model        | SGF | 0.9314                            | 0.0013  | 0.0253    | 0.9515                         | 0.0044  | -0.0351   | 0.9235                           | 0.004   | 0.019     |
|                            | SGS | 0.9324                            | 0.0029  | -0.0169   | 0.986                          | 0.0024  | 0.0173    | 0.9692                           | 0.0034  | -0.0313   |
|                            | ALF | 0.8705                            | 0.004   | 0.8705    | 0.9711                         | 0.005   | -0.0445   | 0.9651                           | 0.0063  | -0.0132   |
| Higuchi Model              | SGF | 0.9809                            | 1.0414  | 0.3433    | 0.7968                         | 2.7033  | -5.802    | 0.8979                           | 2.6269  | -3.3264   |
|                            | SGS | 0.7964                            | 0.4297  | 2.7962    | 0.943                          | 1.6206  | -1.6551   | 0.7986                           | 2.1002  | -4.7915   |
|                            | ALF | 0.8453                            | 0.3209  | 2.1397    | 0.7948                         | 2.927   | -6.29     | 0.8701                           | 3.7743  | -6.2899   |
| Korsmeyer Peppas Model     | SGF | 0.9889                            | 0.4757  | -0.0064   | 0.6966                         | 0.9826  | 0.672     | 0.9448                           | 1.3338  | 0.1873    |
|                            | SGS | 0.7251                            | 0.6022  | -0.2033   | 0.9812                         | 1.6648  | 0.0998    | 0.5398                           | 0.8198  | 0.9146    |
|                            | ALF | 0.8156                            | 0.7286  | 0.1781    | 0.8782                         | 1.2687  | 0.3589    | 0.9299                           | 1.1962  | 0.2251    |

**Table S2: External factors evaluation matrix analysis for the release of Pyrazinamide in three different simulated body fluids.**

| Model for simulated fluids |     | Cinnamon drug loaded nanoemulsion |         |           | Clove drug loaded nanoemulsion |         |           | Eugenol drug loaded nanoemulsion |         |           |
|----------------------------|-----|-----------------------------------|---------|-----------|--------------------------------|---------|-----------|----------------------------------|---------|-----------|
|                            |     | R <sup>2</sup>                    | Slope   | Intercept | R <sup>2</sup>                 | Slope   | Intercept | R <sup>2</sup>                   | Slope   | Intercept |
| Zero Order Model           | SGF | 0.9494                            | 0.0191  | 0.2496    | 0.7498                         | 0.0108  | 0.4246    | 0.9029                           | 0.0558  | -0.3375   |
|                            | SGS | 0.9499                            | 0.0485  | -0.2242   | 0.9362                         | 0.102   | -1.983    | 0.9514                           | 0.0645  | -0.4358   |
|                            | ALF | 0.9865                            | 0.1231  | 0.8554    | 0.9313                         | 0.1117  | -1.5083   | 0.9575                           | 0.2548  | -2.1842   |
| First Order Model          | SGF | 0.9494                            | -0.0191 | 99.75     | 0.7498                         | -0.0108 | 99.575    | 0.9029                           | -0.0558 | 100.34    |
|                            | SGS | 0.9499                            | -0.0485 | 100.22    | 0.9362                         | -0.102  | 101.2     | 0.9514                           | -0.0645 | 100.44    |
|                            | ALF | 0.9865                            | -0.1231 | 100.86    | 0.9313                         | -0.1117 | 101.51    | 0.9575                           | -0.2548 | 102.18    |
| Hixon Crowell Model        | SGF | 0.9473                            | 0.0003  | 0.0041    | 0.7436                         | 0.0002  | 0.0068    | 0.9017                           | 0.0009  | -0.0055   |
|                            | SGS | 0.9506                            | 0.0008  | -0.0035   | 0.9371                         | 0.0016  | -0.0195   | 0.9535                           | 0.001   | -0.0069   |
|                            | ALF | 0.9837                            | 0.0002  | -0.015    | 0.932                          | 0.0018  | -0.0246   | 0.9592                           | 0.0044  | -0.0417   |
| Higuchi Model              | SGF | 0.9424                            | 0.2177  | -0.1529   | 0.9152                         | 1.0445  | -0.4173   | 0.9152                           | 1.0445  | -0.4173   |
|                            | SGS | 0.7954                            | 0.5082  | -0.9858   | 0.9152                         | 1.0445  | -0.4173   | 0.9152                           | 1.0445  | -0.4173   |
|                            | ALF | 0.8056                            | 1.2737  | -2.6954   | 0.9152                         | 1.0445  | -0.4173   | 0.9152                           | 1.0445  | -0.4173   |
| Korsmeyer Peppas Model     | SGF | 0.2934                            | 0.1478  | -0.1355   | 0.2181                         | 0.0776  | -0.0878   | 0.4821                           | 0.2906  | -0.1418   |
|                            | SGS | 0.3795                            | 0.2972  | -0.2089   | 0.3197                         | 0.466   | -0.3995   | 0.281                            | 0.4032  | -0.3751   |
|                            | ALF | 0.7062                            | 0.5128  | -0.202    | 0.228                          | 0.4857  | -0.5182   | 0.6565                           | 0.6969  | -0.296    |

6

7 **Table S3: External factors evaluation matrix analysis for the release of Rifampicin in**  
8 **three different simulated body fluid**

9
